# Supplementary material for: Crystal structures, topological analysis and luminescence properties of three coordination polymers based on a semi-rigid ligand and N-donor ligand linkers
Source: Royal Society of Chemistry journal article supplement (doi:10.1039/c6nj00180g), 2016-01-01
Supplement: c6nj00180g1.pdf [file c6nj00180g1.pdf]

## **Supplemental Material**

### **Crystal structures, topological analysis and luminescent properties of three coordination polymers based on a semi rigid ligand and N-donor ligand linkers**

Xiaobin Liu<sup>a</sup>, Zhenyu Xiao<sup>a</sup>, Ao Huang<sup>a</sup>, Wen Wang<sup>a</sup>, Liangliang Zhang<sup>\*,a</sup>, Rongming Wang <sup>\*,a,b</sup>, Daofeng Sun<sup>a</sup>

<sup>a</sup> State Key Laboratory of Heavy Oil Processing, China University of Petroleum (East China), College of Science, China University of Petroleum (East China), Qingdao Shandong 266580, P. R. China.

<sup>b</sup> State Key Laboratory of Structural Chemistry, Fuzhou, Fujian 350002, P. R. China  
E-mail: rmwang@upc.edu.cn, liangliangzhang@upc.edu.cn

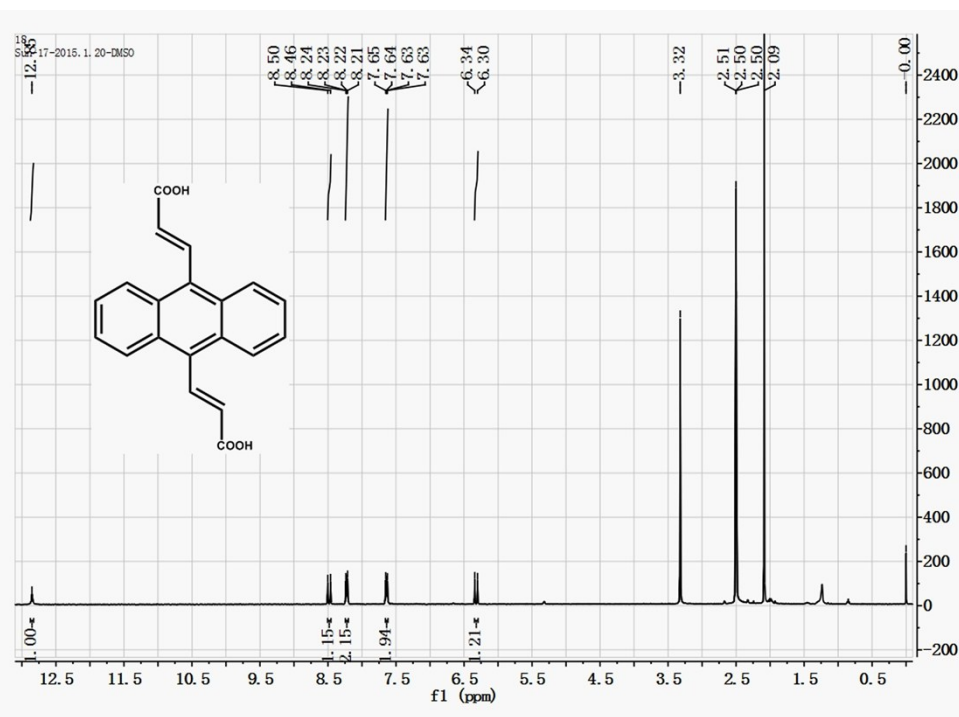

**Figure S1** The  $^1\text{H}$  NMR spectra of  $\text{H}_2\text{ADDA}$  ligand

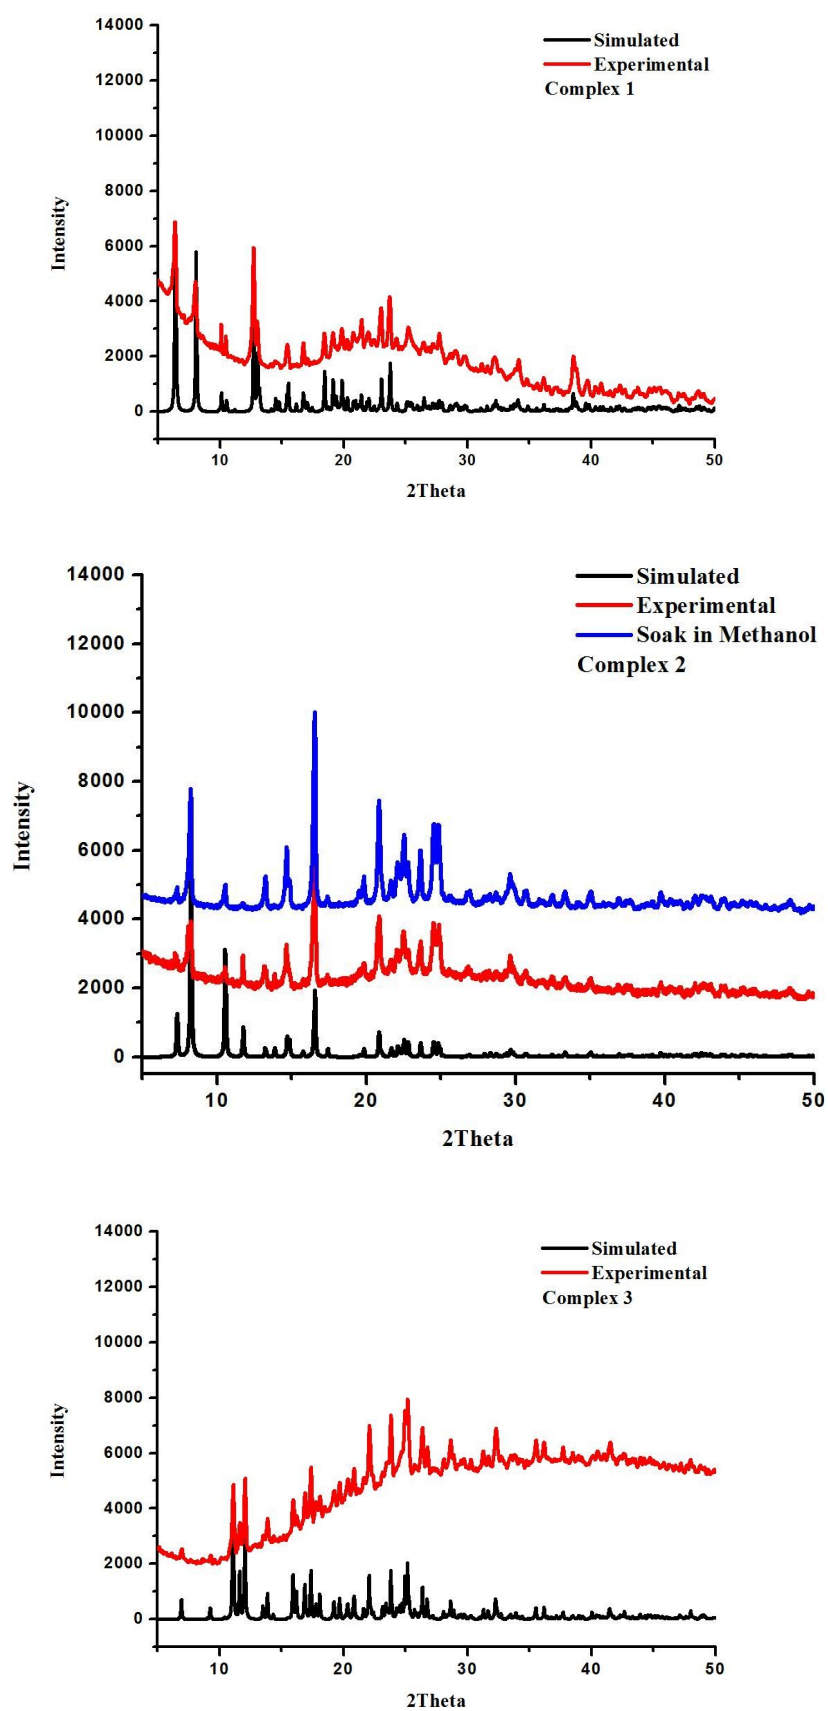

**Figure S2:** The powder XRD patterns of complexes 1-3.

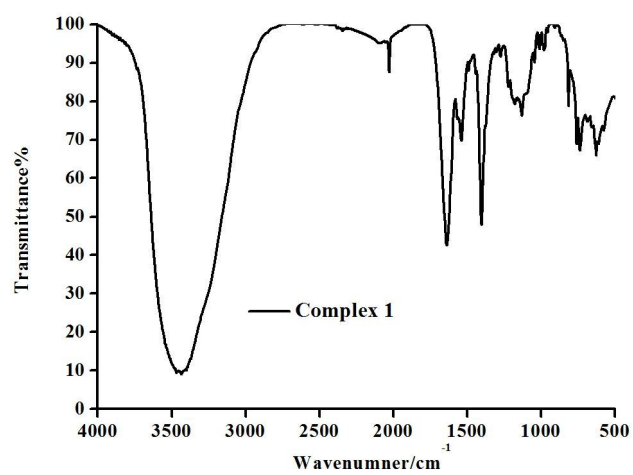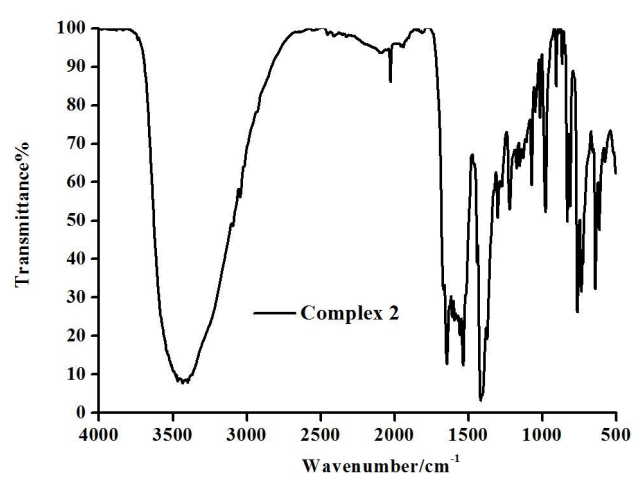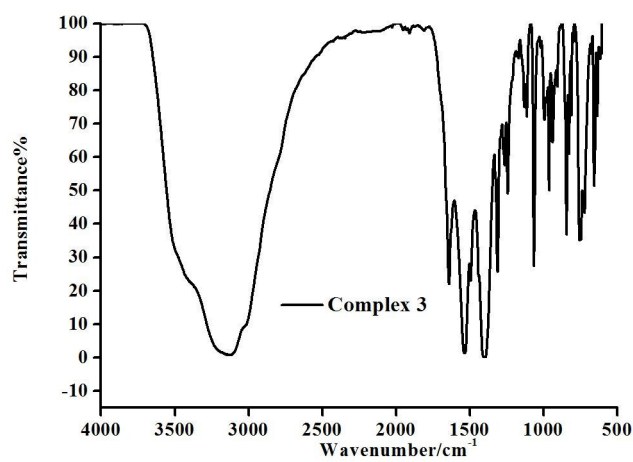

**Figure S3:** IR spectra of 1-3.

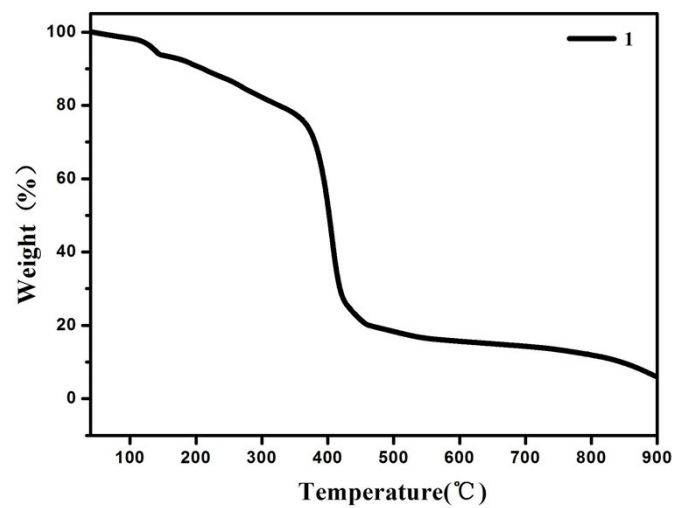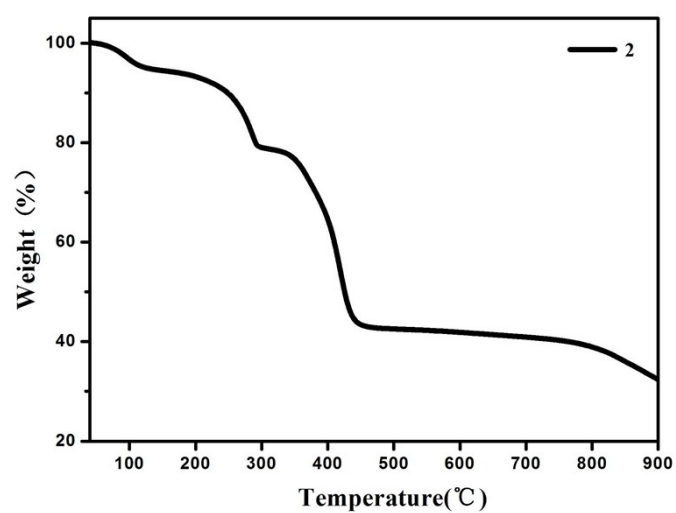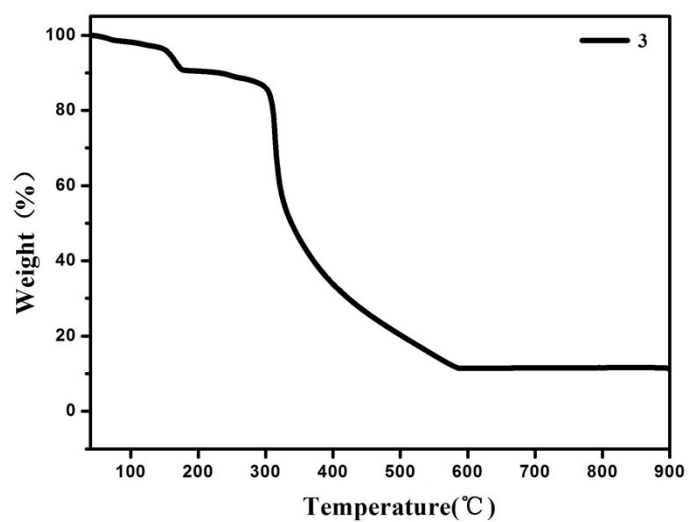

Figure S4: TGA curves for complexes 1-3.

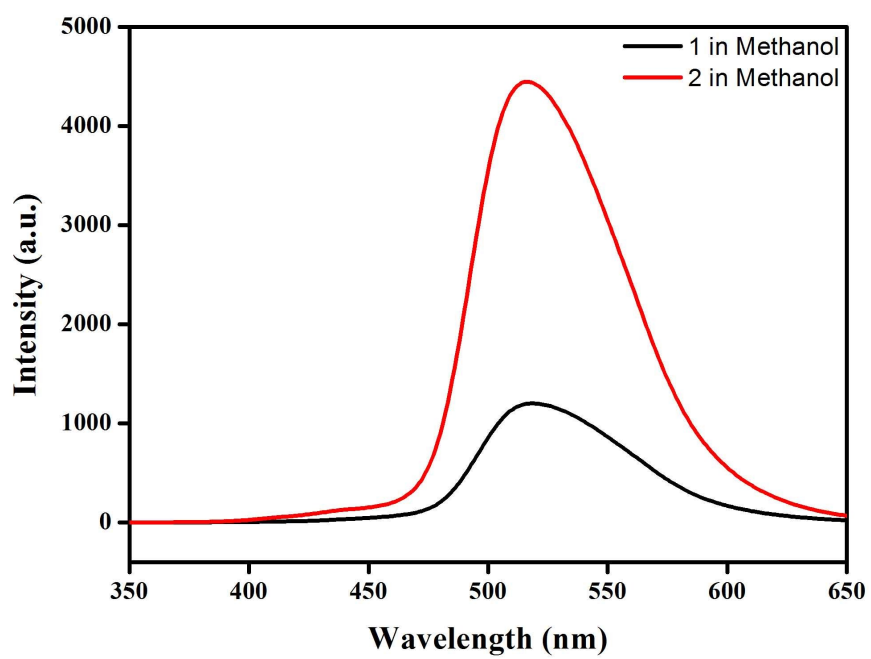

**Figure S5:** The intensity of **1** and **2** dispersed in MeOH.

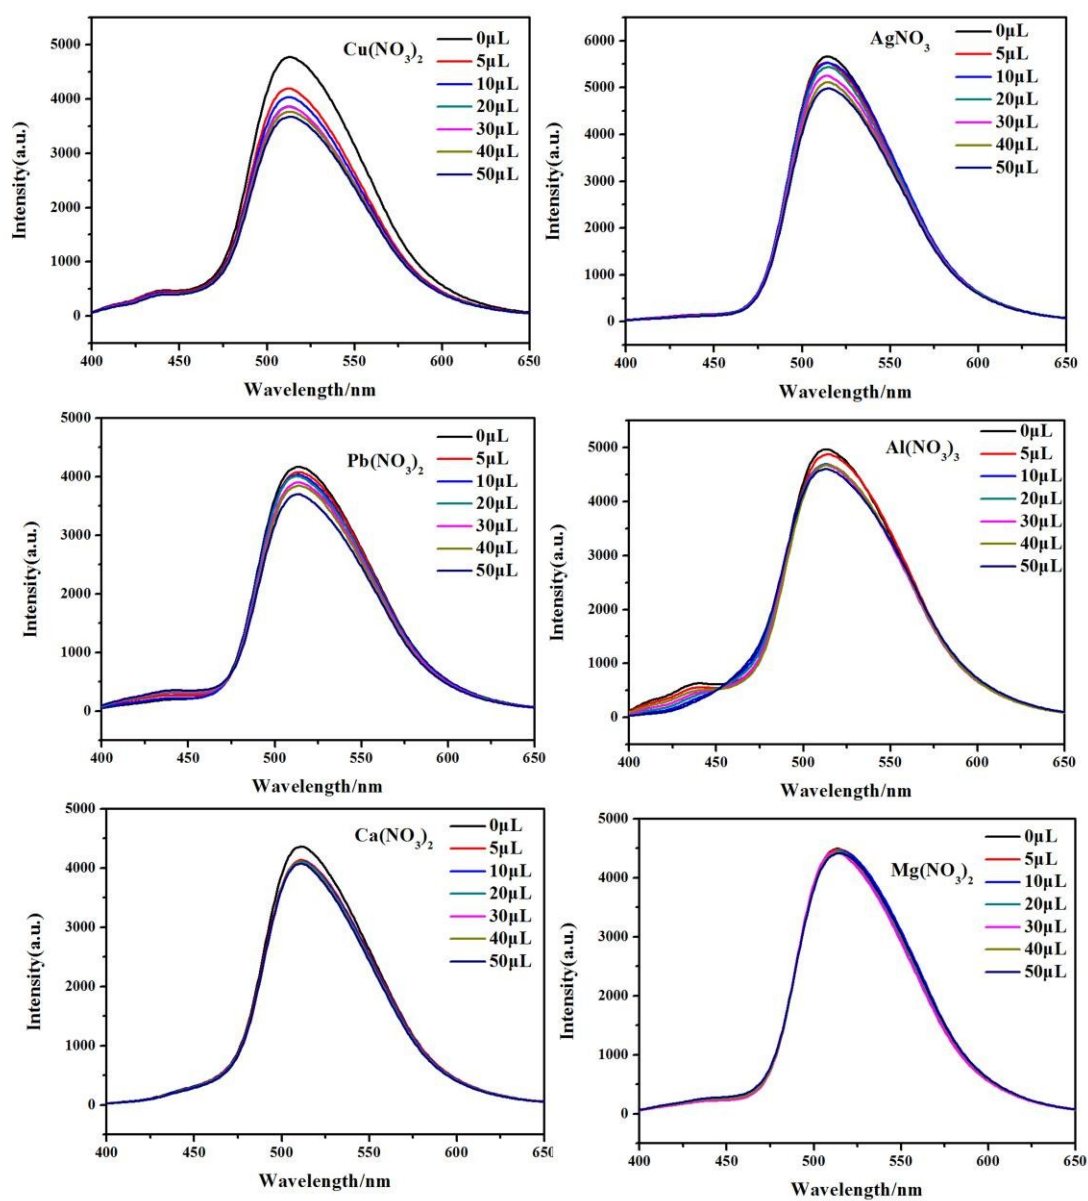

**Figure S6:** Emission intensity of complex **2** dispersed in MeOH upon incremental addition of  $M(\text{NO}_3)_x$  ( $M = \text{Cu}^{2+}, \text{Ag}^+, \text{Pd}^{2+}, \text{Al}^{3+}, \text{Ca}^{2+}, \text{Mg}^{2+}$ ) solution (10 mM) in MeOH.

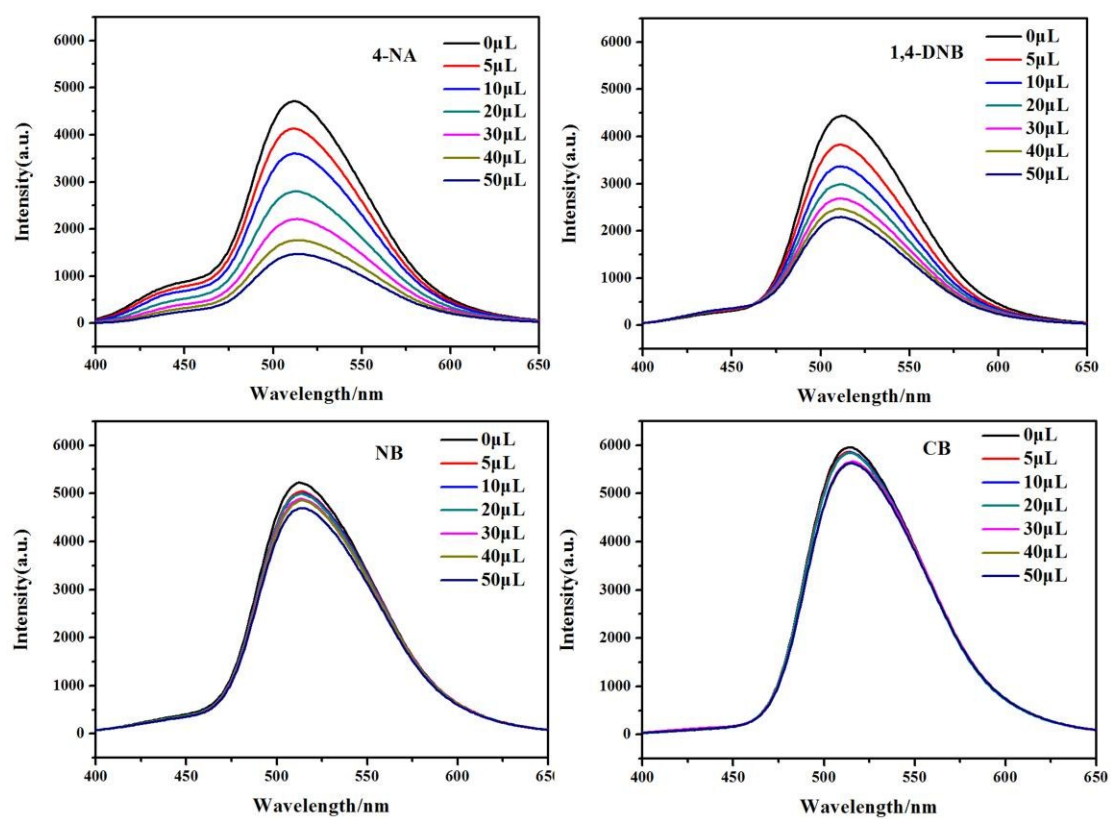

**Figure S7:** Emission intensity of complex **2** dispersed in MeOH upon incremental addition of solution (10 mM) of aromatic compounds (4-NA, 1,4-DNB, NB and CB) in MeOH.
